# Supplementary material for: Monoclonal antibody K312-based depletion of pluripotent cells from differentiated stem cell progeny prevents teratoma formation
Source: PubMed Central journal article supplement — BMB Rep. 2022 Mar 31;55(3):142–7. doi: 10.5483/BMBRep.2022.55.3.090 (PMC8972137; doi:10.5483/bmbrep.2022.55.3.090), 2022-03-31
Supplement: bmb-55-3-142-supple.pdf [file bmb-55-3-142-supple.pdf]

**Title:** Monoclonal antibody K312-based depletion of pluripotent cells from differentiated stem cell progeny prevents teratoma formation

**Authors:** Jongjin Park<sup>1</sup>, Dong Gwang Lee<sup>1</sup>, Na Geum Lee<sup>1</sup>, Min-Gi Kwon<sup>1,2</sup>, Yeon Sung Son<sup>1</sup>, Mi-Young Son<sup>3</sup>, Kwang-Hee Bae<sup>4</sup>, Jangwook Lee<sup>1</sup>, Jong-Gil Park<sup>1</sup>, Nam-Kyung Lee<sup>1,\*</sup>, and Jeong-Ki Min<sup>1,2,\*</sup>

**Affiliation:** <sup>1</sup>Biotherapeutics Translational Research Center, Korea Research Institute of Bioscience and Biotechnology (KRIBB), <sup>2</sup>Department of Biomolecular Science, KRIBB School of Bioscience, Korea University of Science and Technology (UST), <sup>3</sup>Stem Cell Convergence Research Center, KRIBB, <sup>4</sup>Metabolic Regulation Research Center, KRIBB, Daejeon 34141, South Korea

**Running Title:** Use of an antibody to isolate teratogenic cells

**Keywords:** Monoclonal antibody, pluripotent stem cells, stem cell differentiation, cell-surface marker, teratoma

**Corresponding Authors' Information:**

Nam-Kyung Lee, +82-42-860-4117, [nklee@kribb.re.kr](mailto:nklee@kribb.re.kr)

Jeong-Ki Min, +82-42-860-4123, [jekmin@kribb.re.kr](mailto:jekmin@kribb.re.kr)

**A**

| Identified Proteins (peptide sequence coverage, %)                             | Peptide sequence coverage (%) | Protein percentage of total spectra (%) |
|--------------------------------------------------------------------------------|-------------------------------|-----------------------------------------|
| <b>Tubulin beta-2A chain (TUBB 2A)</b>                                         | <b>70</b>                     | <b>0.46</b>                             |
| Tubulin beta chain                                                             | 69                            | 0.14                                    |
| Actin, cytoplasmic 1                                                           | 68                            | 0.30                                    |
| Tubulin beta-4B chain                                                          | 66                            | 0.015                                   |
| Eukaryotic initiation factor 4A-l                                              | 62                            | 0.18                                    |
| Tubulin alpha-1B chain                                                         | 61                            | 0.31                                    |
| <b>Tubulin beta-3 chain (TUBB 3)</b>                                           | <b>51</b>                     | <b>0.044</b>                            |
| Elongation factor 1-alpha 1                                                    | 49                            | 0.22                                    |
| cDNA FLJ11352 fis, clone HEMBA1000020, highly similar to Tubulin beta-2C chain | 48                            | 0.029                                   |
| Poly(rC)-binding protein 1                                                     | 44                            | 0.080                                   |
| <b>Vimentin</b>                                                                | <b>33</b>                     | <b>0.087</b>                            |
| Spliceosome RNA helicase DDX39B                                                | 32                            | 0.058                                   |
| Tubulin beta-6 chain                                                           | 31                            | 0.029                                   |
| ATP synthase subunit beta, mitochondrial                                       | 29                            | 0.073                                   |
| Isoform 2 of Poly(rC)-binding protein 2                                        | 28                            | 0.022                                   |
| Alpha-enolase                                                                  | 23                            | 0.044                                   |
| Keratin, type I cytoskeletal 18                                                | 21                            | 0.029                                   |
| D-3-phosphoglycerate dehydrogenase                                             | 20                            | 0.058                                   |

**B**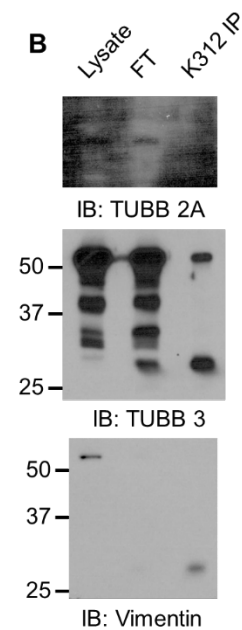

**Supplemental Figure 1. Mass spectrometry analysis for identification of the K312 target protein.** H9 hESC lysates were immunoprecipitated with the K312 antibody and a protein band visualized in the SDS-PAGE gel was analyzed by mass spectrometry. (A) A list of proteins identified from the analyzed peptide sequences. Candidate proteins are listed in order of highest peptide coverage. From the list, TUBB (Tubulin beta class I) 2A, TUBB 3, and vimentin were selected as candidate targets based on the molecular weight (~60 kDa). (B) H9 hESC lysates were immunoprecipitated with the K312 antibody, followed by immunoblotting analysis using an HRP-labeled secondary antibody targeting each candidate. None of the candidate proteins precipitated with K312 (FT: flow-through, K312 IP: immunoprecipitated with K312). The detected protein bands, about ~50 and ~25 kDa in size, are expected to be heavy and light chains of K312, respectively.

**A**

| Identified Proteins (peptide sequence coverage, %) | Peptide sequence coverage (%) | Protein percentage of total spectra (%) |
|----------------------------------------------------|-------------------------------|-----------------------------------------|
| Tubulin beta-2B chain                              | 62                            | 0.37                                    |
| Tubulin beta-2A chain                              | 62                            | 0.019                                   |
| Tubulin beta-4B chain                              | 59                            | 0.029                                   |
| Tubulin beta chain                                 | 56                            | 0.029                                   |
| Tubulin beta-4B chain                              | 54                            | 0.029                                   |
| Tubulin alpha-1B chain                             | 50                            | 0.29                                    |
| Tubulin beta-3 chain                               | 35                            | 0.038                                   |
| Tubulin beta-6 chain                               | 31                            | 0.038                                   |
| Vimentin                                           | 26                            | 0.15                                    |
| Elongation factor 1-alpha 1                        | 23                            | 0.077                                   |
| ATP synthase subunit beta, mitochondrial           | 19                            | 0.077                                   |

**B**

| Identified Proteins (peptide sequence coverage, %) | Peptide sequence coverage (%) | Protein percentage of total spectra (%) |
|----------------------------------------------------|-------------------------------|-----------------------------------------|
| Tubulin beta-2B chain                              | 52                            | 0.37                                    |
| Tubulin beta chain                                 | 52                            | 0.019                                   |
| Eukaryotic initiation factor 4A-I                  | 47                            | 0.029                                   |
| Elongation factor 1-alpha 1                        | 45                            | 0.029                                   |
| Alpha-enolase                                      | 45                            | 0.029                                   |
| Tubulin beta-3 chain                               | 42                            | 0.29                                    |
| Tubulin alpha-1B                                   | 39                            | 0.038                                   |
| Actin, cytoplasmic 1                               | 38                            | 0.038                                   |
| Tubulin beta-6 chain                               | 34                            | 0.15                                    |
| ATP-dependent RNA helicase DDX39A                  | 33                            | 0.077                                   |
| 26S proteasome regulatory subunit 6B               | 32                            | 0.077                                   |

**Supplemental Figure 2. Additional mass spectrometry analysis for identification of the K312 target protein.** (A and B) A list of proteins identified by mass spectrometry. Two additional mass spectrometry analyses were performed using protein bands immunoprecipitated with K312.

## Supplemental Methods

### Mass spectrometry analysis

To identify the target of K312, H9 hESCs ( $10^8$  cells) were lysed using RIPA buffer and immunoprecipitated with K312-bound protein G agarose beads (Merck Millipore). K312-bound proteins were fractionated by SDS-PAGE and stained with Coomassie brilliant blue G-250 (BIO-RAD). The protein bands about ~60 kDa in size were carefully cut and fully destained with 30% methyl alcohol. Thereafter, the gel fragments were dehydrated in pure acetonitrile for 10 minutes and desiccated in a vacuum centrifuge. All fragments were further digested with trypsin (Promega) in 50 mM ammonium bicarbonate for 16 hours at 37 °C. Trypsinized proteins were concentrated using C18ZipTips (Millipore) and eluted with 50% (v/v) acetonitrile water. Peptide fragment mass spectrometry was carried out using a Q-TOF MS (Micromass), equipped with a nano-ESI source. The solution of protein fragments was sprayed at a 2 kV potential, leading to the production of molecular ions. To acquire peptide ions, the collision energy was raised from 10 eV to 30 eV for the collision-induced dissociation process. Argon was introduced as a collision gas at 10 psi. The Masslynx program (Micromass) was used for data trimming, and the MS-Tag searching program was used for identifying proteins corresponding to the fragment sequences.
